# Supplementary material for: Embryo CHH hypermethylation is mediated by RdDM and is autonomously directed in Brassica rapa
Source: PubMed Central journal article supplement (PMC8101221; doi:10.1186/s13059-021-02358-3), 2021-05-06
Supplement: 13059_2021_2358_MOESM1_ESM.pdf [file 13059_2021_2358_MOESM1_ESM.pdf]

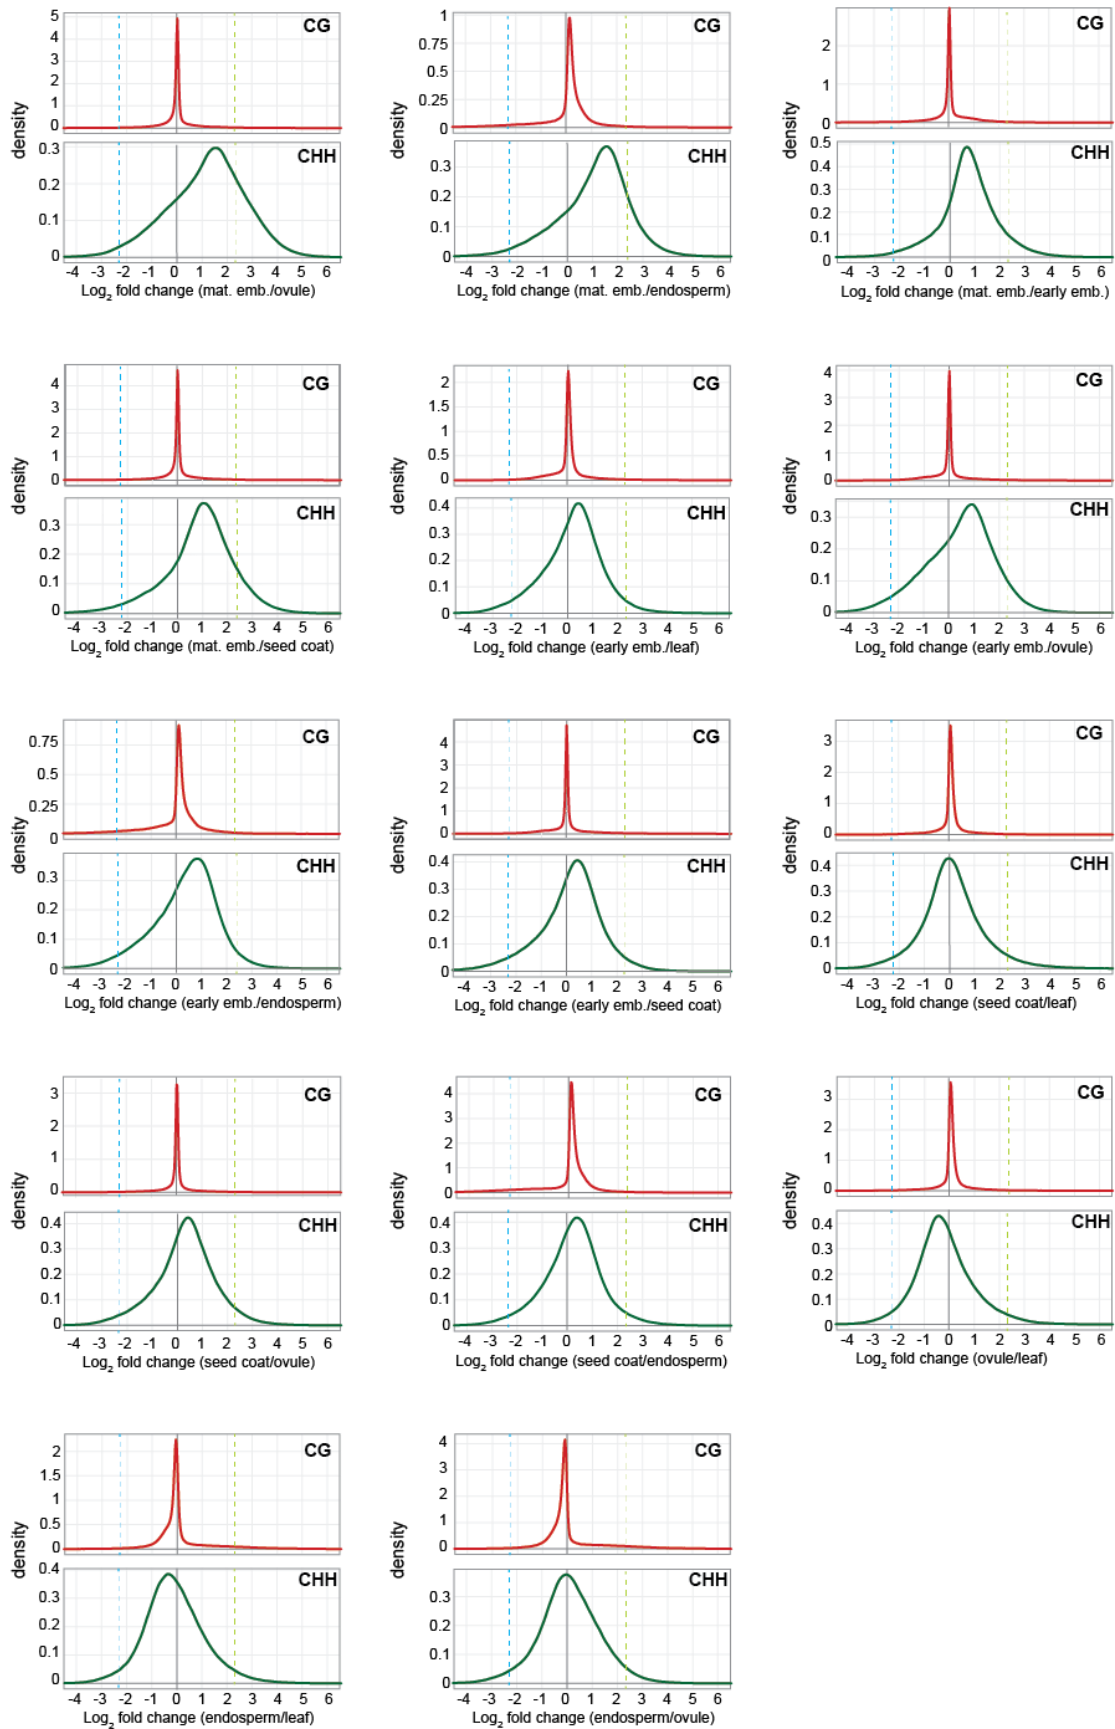

**Supplemental Figure 1. CG and CHH distribution of methylation changes for all tissue comparisons.** Density distributions plotted as in Figure 3.

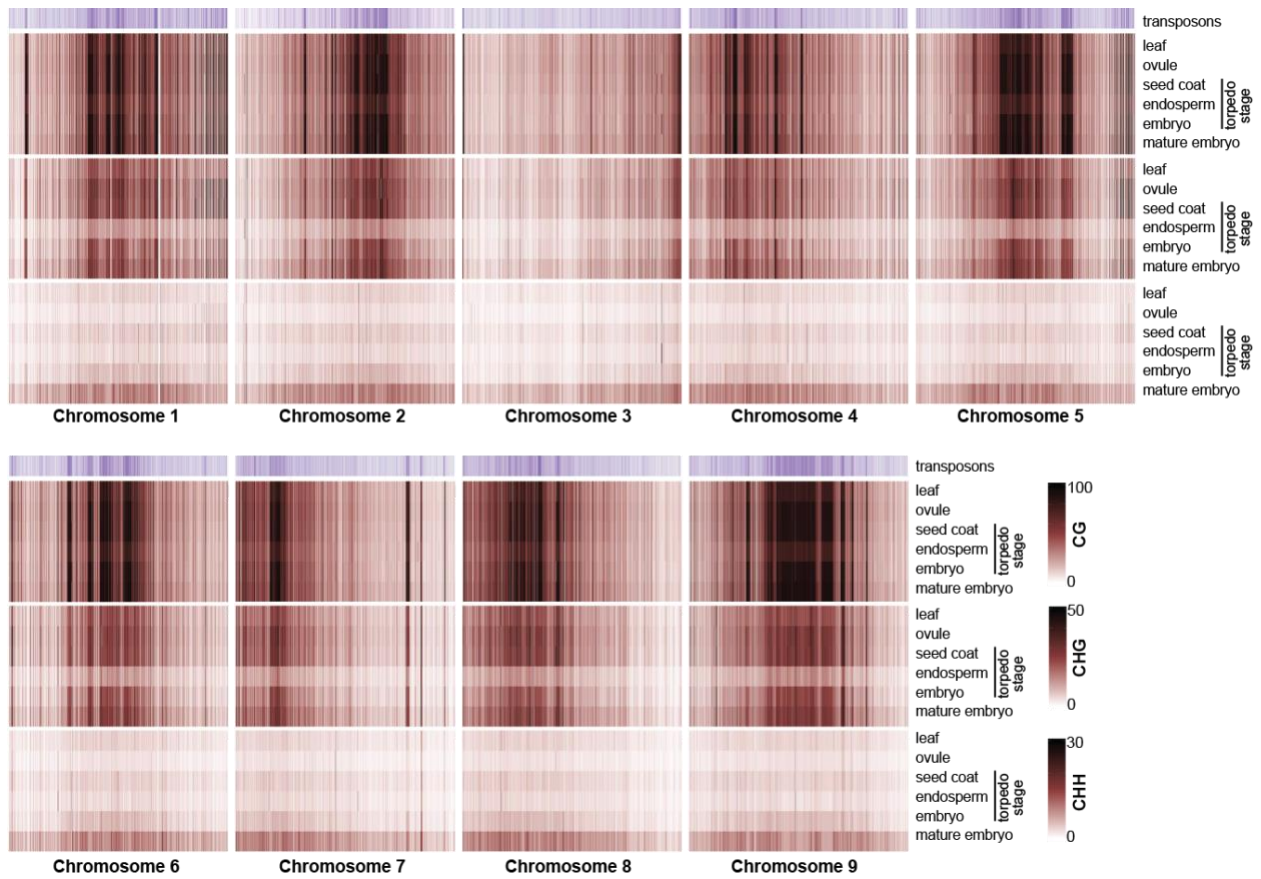

**Supplemental Figure 2. Heatmaps of methylation on *B. rapa* chromosomes 1-9.**  
Heat maps of methylation in 25-kb windows across *B. rapa* chromosomes, as in Figure 2A.

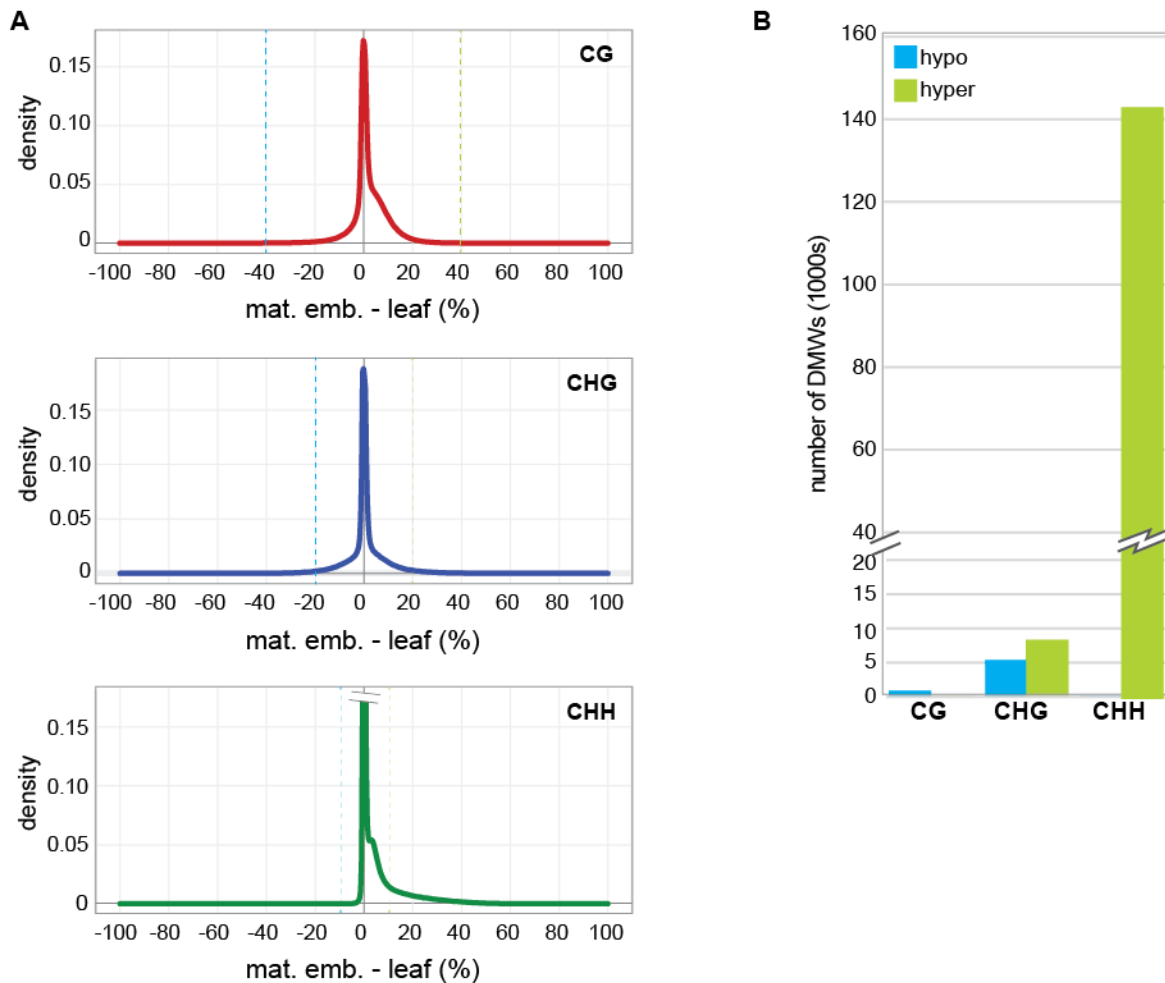

**Supplemental Figure 3. Alternative method for assessing changes in DNA methylation.**

(A) The distribution of difference in methylation (mature embryo % methylation – leaf % methylation) at 300-nt genomic windows with at least 5 reads coverage. Dashed yellow and blue lines denote the difference thresholds used to identify substantial changes in methylation (40% for CG, 20% for CHG, and 10% for CHH). The number of windows beyond these thresholds and having an FDR-adjusted p-value < 0.005 are shown in (B). Similar to the fold-change calculation in Figure 3, this alternative calculation demonstrates that the primary difference in methylation between leaves and mature embryos is hypermethylation of CHH sites.

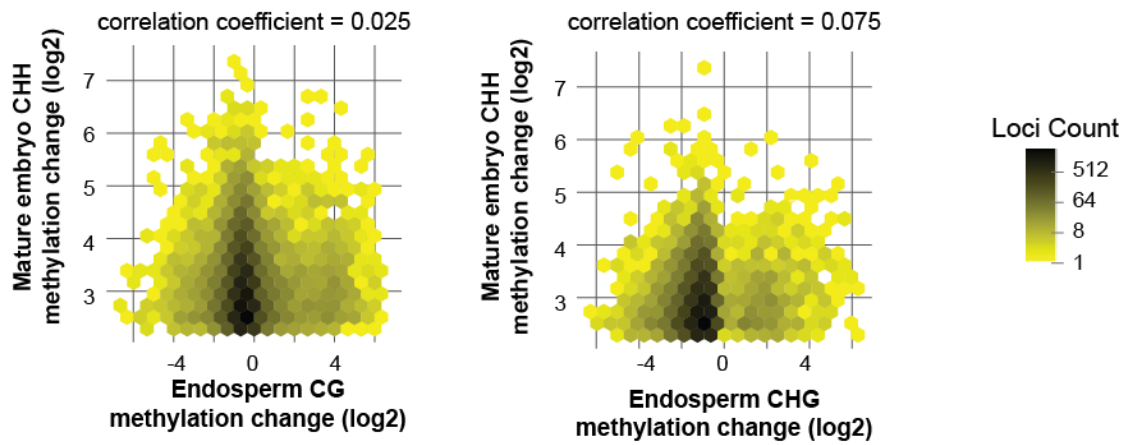

**Supplemental Figure 4. No correlation between endosperm demethylation and embryo hypermethylation at CHH hyper-DMWs.**

Hex plots of mature embryo CHH methylation change by torpedo-stage endosperm CG (left) or CHG (right) methylation change. Only CHH hyper-DMWs are plotted (whole genome plotted in Figure 5C).

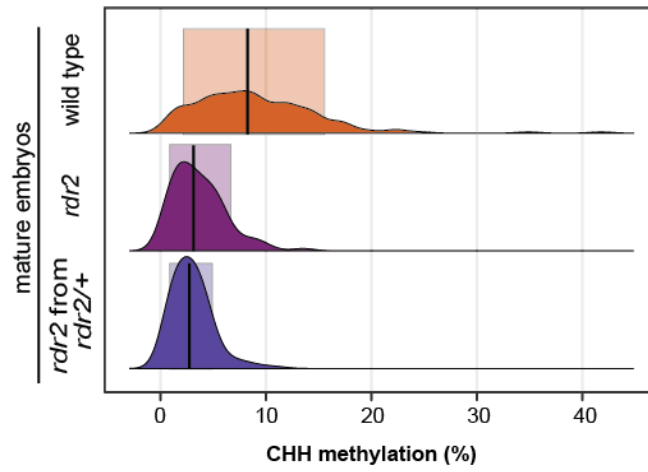

**Supplemental Figure 5. Mature embryo methylation at siren loci.**

Distribution of CHH methylation at siren loci in mature embryos. *rdr2* embryos were derived either from *rdr2* homozygous mothers (maroon) or from *rdr2/+* heterozygous mothers (purple).

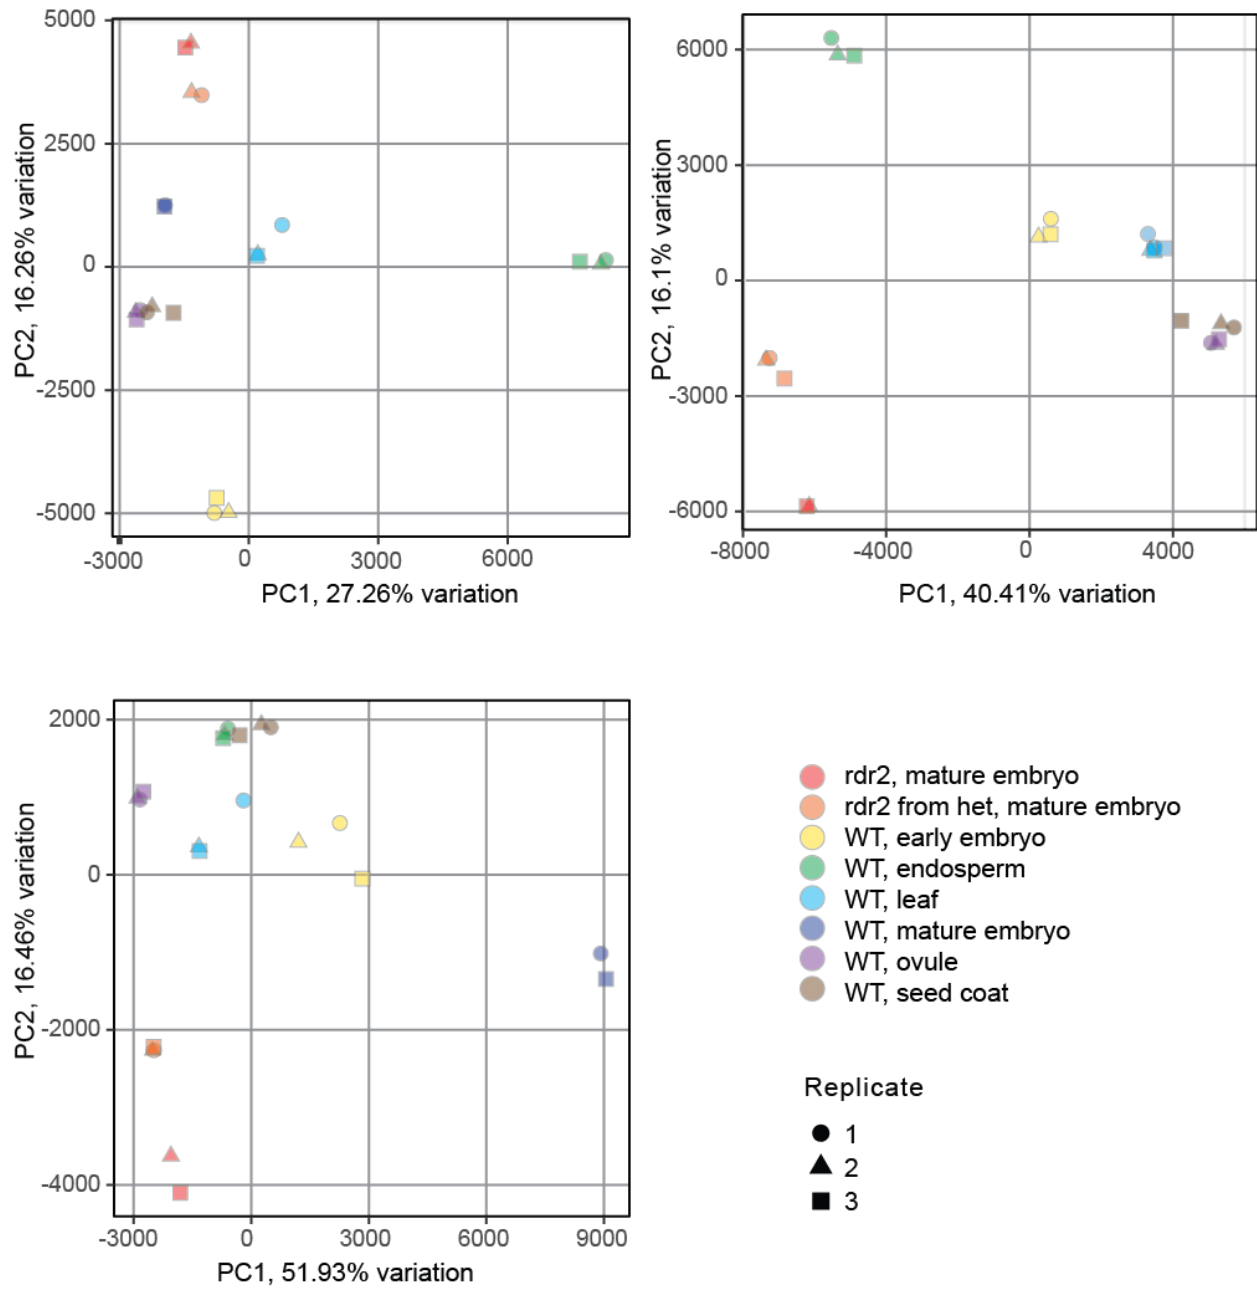

**Supplemental Figure 6. PCA analysis of WGBS replicates**

**Supplemental Table 1. WGBS sequence datasets**

| Genotype                    | Tissue         | Replicate | NCBI identifier | De-multiplexed Reads | Deduplicated Alignments | Mapping Rate % | Coverage X | Conversion Rate (lambda DNA) | Conversion Rate (chloroplast DNA) |
|-----------------------------|----------------|-----------|-----------------|----------------------|-------------------------|----------------|------------|------------------------------|-----------------------------------|
| WT R-o-18                   | leaf           | 1         | SRX7113698      | 33,843,130           | 18,626,017              | 55.43%         | 8.24       | 99.66                        | 99.60                             |
| WT R-o-18                   | leaf           | 2         | SRX7113699      | 34,414,305           | 16,928,242              | 49.56%         | 7.46       | 99.68                        | 99.66                             |
| WT R-o-18                   | leaf           | 3         | SRX7113700      | 39,216,330           | 19,653,280              | 50.69%         | 8.73       | 99.63                        | 99.61                             |
| WT R-o-18                   | ovule          | 1         | SRX7113704      | 35,677,253           | 20,580,397              | 58.35%         | 9.08       | 99.64                        | 99.52                             |
| WT R-o-18                   | ovule          | 2         | SRX7113705      | 38,415,932           | 22,250,022              | 58.58%         | 9.81       | 99.65                        | 99.51                             |
| WT R-o-18                   | ovule          | 3         | SRX7113706      | 33,159,726           | 19,047,779              | 58.06%         | 8.38       | 99.63                        | 99.47                             |
| WT R-o-18 x R500            | endosperm      | 1         | SRX8941582      | 37,703,830           | 20,112,987              | 54.30%         | 9.09       | 99.71                        | 99.55                             |
| WT R-o-18 x R500            | endosperm      | 2         | SRX8941583      | 40,064,286           | 20,957,711              | 53.18%         | 9.61       | 99.69                        | 99.49                             |
| WT R-o-18 x R500            | endosperm      | 3         | SRX8941584      | 42,843,140           | 22,831,013              | 53.88%         | 10.40      | 99.70                        | 99.50                             |
| WT R-o-18 x R500            | seed coat      | 1         | SRX8941585      | 37,809,229           | 20,014,869              | 53.89%         | 9.10       | 99.71                        | 99.36                             |
| WT R-o-18 x R500            | seed coat      | 2         | SRX8941586      | 38,519,379           | 19,894,934              | 50.06%         | 8.94       | 99.76                        | 99.43                             |
| WT R-o-18 x R500            | seed coat      | 3         | SRX8941587      | 40,731,277           | 21,863,906              | 54.61%         | 9.95       | 99.69                        | 99.36                             |
| WT R-o-18 x R500            | torpedo embryo | 1         | SRX8941594      | 37,095,900           | 18,335,536              | 49.81%         | 5.81       | 99.72                        | 99.65                             |
| WT R-o-18 x R500            | torpedo embryo | 2         | SRX8941595      | 37,168,809           | 18,136,734              | 50.34%         | 8.35       | 99.71                        | 99.66                             |
| WT R-o-18 x R500            | torpedo embryo | 3         | SRX8941581      | 39,057,700           | 19,063,283              | 49.35%         | 8.94       | 99.67                        | 99.63                             |
| rdr2 R-o-18                 | mature embryo  | 1         | SRX8941580      | 42,990,881           | 22,738,273              | 52.89%         | 10.02      | 99.57                        | 99.56                             |
| rdr2 R-o-18                 | mature embryo  | 2         | SRX8941588      | 44,373,420           | 24,006,617              | 54.10%         | 10.51      | 99.52                        | 99.48                             |
| rdr2 from het mother R-o-18 | mature embryo  | 1         | SRX8941589      | 48,591,584           | 24,052,250              | 49.50%         | 10.83      | 99.62                        | 99.57                             |
| rdr2 from het mother R-o-18 | mature embryo  | 2         | SRX8941590      | 45,727,329           | 22,713,974              | 49.67%         | 10.11      | 99.56                        | 99.54                             |
| rdr2 from het mother R-o-18 | mature embryo  | 3         | SRX8941591      | 45,076,722           | 21,617,299              | 47.96%         | 9.77       | 99.59                        | 99.56                             |
| WT R-o-18                   | mature embryo  | 1         | SRX8941592      | 48,525,785           | 24,826,190              | 51.16%         | 10.95      | 99.43                        | 99.52                             |
| WT R-o-18                   | mature embryo  | 2         | SRX8941593      | 40,351,733           | 20,545,946              | 50.92%         | 9.04       | 99.50                        | 99.57                             |

## Supplemental Table 2. sRNA sequence datasets

| Genotype        | Tissue          | Replicate | NCBI identifier | De-multiplexed Reads | Trimming & q > 30 filtering | % Remaining | rfam <i>B. rapa</i> & <i>A. thaliana</i> Filtered | % Remaining | <i>B. rapa</i> and <i>A. thaliana</i> CM Filtered | % Remaining | Mapped to R-18 and 19-26nt Small RNAs filtered | % Remaining |
|-----------------|-----------------|-----------|-----------------|----------------------|-----------------------------|-------------|---------------------------------------------------|-------------|---------------------------------------------------|-------------|------------------------------------------------|-------------|
| WTR-o-18        | 17dpf endosperm | 1         | SRX7113618      | 14,782,390           | 6,319,548                   | 42.75%      | 6,319,238                                         | 99.9951%    | 6,210,368                                         | 98.277%     | 4,033,404                                      | 64.95%      |
| WTR-o-18        | 17dpf endosperm | 2         | SRX7113619      | 23,412,918           | 9,108,385                   | 38.90%      | 9,107,867                                         | 99.9943%    | 8,963,673                                         | 98.417%     | 6,033,604                                      | 67.31%      |
| WTR-o-18        | 17dpf endosperm | 3         | SRX7113620      | 14,579,403           | 5,827,576                   | 39.97%      | 5,827,156                                         | 99.9928%    | 5,718,292                                         | 98.132%     | 3,618,539                                      | 63.28%      |
| WTR-o-18        | 17dpf embryo    | 1         | SRX7113621      | 21,823,191           | 15,937,453                  | 73.03%      | 15,936,988                                        | 99.9971%    | 15,445,456                                        | 96.916%     | 10,619,292                                     | 68.75%      |
| WTR-o-18        | 17dpf embryo    | 2         | SRX7113622      | 26,629,773           | 18,404,570                  | 69.11%      | 18,404,128                                        | 99.9976%    | 17,914,651                                        | 97.340%     | 12,031,834                                     | 67.16%      |
| WTR-o-18        | 17dpf embryo    | 3         | SRX7113623      | 21,903,128           | 13,863,523                  | 63.29%      | 13,863,171                                        | 99.9975%    | 13,459,146                                        | 97.086%     | 9,174,737                                      | 68.17%      |
| WTR-o-18        | Leaves          | 1         | SRX7113689      | 27,441,990           | 10,767,807                  | 39.24%      | 10,767,489                                        | 99.9970%    | 8,391,872                                         | 77.937%     | 3,635,851                                      | 43.33%      |
| WTR-o-18        | Leaves          | 2         | SRX7113690      | 33,992,611           | 11,177,367                  | 32.88%      | 11,176,716                                        | 99.9942%    | 9,002,798                                         | 80.550%     | 4,033,874                                      | 44.81%      |
| WTR-o-18        | Leaves          | 3         | SRX7113691      | 29,436,807           | 9,381,536                   | 31.87%      | 9,381,375                                         | 99.9983%    | 7,546,841                                         | 80.445%     | 3,146,617                                      | 41.69%      |
| WTR-o-18xR-o-18 | Embryo          | 1         | SRX7113624      | 21,304,038           | 4,941,922                   | 23.20%      | 4,941,786                                         | 99.9972%    | 4,804,648                                         | 97.225%     | 3,098,803                                      | 64.50%      |
| WTR-o-18xR-o-18 | Embryo          | 2         | SRX7113625      | 16,203,619           | 4,132,008                   | 25.50%      | 4,131,841                                         | 99.9960%    | 4,014,630                                         | 97.163%     | 2,726,752                                      | 67.92%      |
| WTR-o-18xR-o-18 | Embryo          | 3         | SRX7113626      | 18,581,017           | 2,302,004                   | 12.39%      | 2,301,886                                         | 99.9949%    | 2,199,864                                         | 95.568%     | 1,446,836                                      | 65.77%      |



**Supplemental Table 3. Pearson correlation coefficients, r, for endosperm to embryo methylation.**

Correlation between endosperm methylation and mature embryo CHH methylation at all genomic windows with sufficient read depth

|     | absolute methylation (%) | fold change | difference in methylation (%) |
|-----|--------------------------|-------------|-------------------------------|
| CG  | 0.53                     | -0.19       | -0.36                         |
| CHG | 0.69                     | -0.093      | -0.48                         |
| CHH | 0.82                     | 0.38        | 0.19                          |

Correlation between endosperm methylation and mature embryo CHH methylation at CHH hyper-DMWs

|     | absolute methylation (%) | fold change | difference in methylation (%) |
|-----|--------------------------|-------------|-------------------------------|
| CG  | 0.37                     | 0.025       | -0.23                         |
| CHG | 0.45                     | 0.075       | -0.35                         |
| CHH | 0.60                     | 0.51        | 0.34                          |
